# Supplementary material
Source: PubMed Central journal article supplement (PMC8501193)
Supplement: mmc1.pdf [file mmc1.pdf]

Supplementary material

# **Transmission risk of SARS-CoV-2 in the watershed triggered by domestic wastewater discharge**

*Zhenyu Wang<sup>c, 1</sup>, Wenyu Yang<sup>c, 1</sup>, Pei Hua<sup>a, b, \*</sup>, Jin Zhang<sup>d</sup>,  
and Peter Krebs<sup>c</sup>*

<sup>a</sup> SCNU Environmental Research Institute, Guangdong Provincial Key Laboratory of Chemical  
Pollution and Environmental Safety & MOE Key Laboratory of Theoretical Chemistry of  
Environment, South China Normal University, China

<sup>b</sup> School of Environment, South China Normal University, University Town, Guangzhou, China

<sup>c</sup> Institute of Urban and Industrial Water Management, Technische Universität Dresden, 01062  
Dresden, Germany

<sup>d</sup> Department of Ecology and Institute of Hydrobiology, Jinan University, 510632 Guangzhou,  
China

<sup>1</sup> These authors contributed equally to this work

\*Corresponding author:

pei.hua@m.scnu.edu.cn

## **S1 The statistical analysis of toilet usage frequency**

Previous studies reported that people participating in regular working and educational activities usually experience varying degrees of psychological stress and physical fatigue due to commuting pressure, lack of autonomy, and unhealthy diet, which could lead to endocrine disorders and thereby experiencing reduced urination and defecation frequency and even defecation disorders (Clarke and James, 2003; Gideon et al., 2019; Palit et al., 2012; Rao et al., 2016). However, participation in working and educational activities through home-office patterns during lockdown relieves psychosocial stress and physical fatigue due to the reduced commuting stress, increased autonomy, and healthier diet (Giménez-Nadal José et al., 2019; Hornung and Glaser, 2009; Oakman et al., 2020; Tustin, 2014). As a result, the toilet usage frequency of home-office population during lockdown would increase to some extent compared to the normal situation and possibly increase the virus loads in daily excretions and spread risk in natural water.

The scenarios of toilet usage frequency were determined based on the statistical analysis of the urination and defecation frequency of the population. More explicitly, according to the investigation of people from different regions in the previous study (Heaton et al., 1992; Myo et al., 1994; Panigrahi et al., 2013; Sanjoaquin et al., 2004; Simons et al., 2010), the urination and defecation frequencies of people with different ages and genders were statistically analysed, the minimum, the maximum, and the average values were listed in Table S1. The analysis result demonstrated that although the urination and defecation frequencies varied greatly among age groups, the ratios of the maximum value to the average value were relatively stable, with the ranges of 1.09-1.15 and 1.92-2.08, respectively. According to the previous studies (Clarke and James,

2003; Gideon et al., 2019; Oakman et al., 2020; Palit et al., 2012; Rao et al., 2016), the average value was regarded as the normal scenario, and the maximum value was regarded as the increasing scenario. Based on the results of statistical analysis, the toilet usage frequency constant of the normal scenario was set as 1, and the toilet usage frequency constant of the increasing scenario was set as 1.13 for urination frequency and 1.96 for defecation frequency.

## Supplementary Figures and Tables

Table S1 The statistical urination frequency and defecation frequency

| Age (years) | Urination frequency (times / week) |       |         |        |       |         | Defecation frequency (times / week) |     |         |        |     |         | Reference                                                                                                                 |
|-------------|------------------------------------|-------|---------|--------|-------|---------|-------------------------------------|-----|---------|--------|-----|---------|---------------------------------------------------------------------------------------------------------------------------|
|             | Male                               |       |         | Female |       |         | Male                                |     |         | Female |     |         |                                                                                                                           |
|             | Min                                | Max   | Average | Min    | Max   | Average | Min                                 | Max | Average | Min    | Max | Average |                                                                                                                           |
| 1-4         | 35                                 | 50.41 | 49      | 35     | 50.41 | 49      | 5.59                                | 21  | 7       | 5.59   | 21  | 7       | (Heaton et al., 1992;<br>Myo et al., 1994;<br>Panigrahi et al., 2013;<br>Sanjoaquin et al., 2004;<br>Simons et al., 2010) |
| 20-39       | 35                                 | 53    | 46      | 35     | 53    | 47.6    | 3                                   | 21  | 12      | 3      | 21  | 10.5    |                                                                                                                           |
| 40-69       | 35                                 | 53    | 46.2    | 35     | 54    | 47.5    | 3                                   | 21  | 11.8    | 2      | 21  | 10      |                                                                                                                           |
| >70         | 44                                 | 52    | 45.8    | 44     | 52    | 47.2    | 4                                   | 12  | 10.2    | 4      | 12  | 9.8     |                                                                                                                           |

Table S2 The parameter of the exponential dose-response models fitted to data sets on coronavirus infection

| Virus     | Host   | 1/k                 | k                   | Unit*                            | k (copies <sup>-1</sup> ) | Reference                    |
|-----------|--------|---------------------|---------------------|----------------------------------|---------------------------|------------------------------|
| SARS-CoV  | /      | 4.10E+02            | 2.44E-03            | PFU <sup>-1</sup>                | 3.16E-06                  | Watanabe et al. (2010)       |
| SARS-CoV  | Mice   | [6.19E+04,7.28E+05] | [1.37E-06,1.62E-05] | Copies <sup>-1</sup>             | [1.37E-06,1.62E-05]       | Zhang and Wang (2020)        |
| SARS-CoV  | Mice   | /                   | 2.97E-03            | PFU <sup>-1</sup>                | 3.84E-06                  | DeDiego et al. (2008)        |
| SARS-CoV  | Mice   | /                   | 2.14E-03            | PFU <sup>-1</sup>                | 2.77E-06                  | De Albuquerque et al. (2006) |
| HCoV-229E | Humans | 1.85E+01            | 5.39E-02            | TCID <sub>50</sub> <sup>-1</sup> | 7.70E-05                  | Bradburne et al. (1967)      |
| HEV-67N   | Mice   | 2.04E+03            | 4.91E-04            | PFU <sup>-1</sup>                | 6.35E-07                  | Hirano et al. (2001)         |
| MERS-Cov  | Mice   | /                   | 5.71E-03            | TCID <sub>50</sub> <sup>-1</sup> | 8.16E-06                  | Lunn et al. (2019)           |

\*The conversion of k's unit (PFU<sup>-1</sup>, TCID<sub>50</sub><sup>-1</sup> and copies<sup>-1</sup>) is based on the harmonization rules of 1 TCID<sub>50</sub><sup>-1</sup> ≈ 1/700 copies<sup>-1</sup> (McBride et al., 2013)

and 1 PFU<sup>-1</sup> = 773 copies<sup>-1</sup> (Jonsson et al., 2009; Puig et al., 1994).

Table S3 The parameter of the exposure dose for population during recreational activities near waters

| Activity                  | Exposure pathway        | Exposure dose (mL/person/event)                                                | Reference               |
|---------------------------|-------------------------|--------------------------------------------------------------------------------|-------------------------|
| Recreation                | Skin, oral inhalation   | 100                                                                            | Yang et al. (2020)      |
| Farmland irrigation water | Oral, breath inhalation | 10                                                                             |                         |
| Canoeing                  | Ingestion               | Norm (3.9, 4.03 <sup>2</sup> )                                                 | Dorevitch et al. (2011) |
| Fishing                   | Ingestion               | Norm (3.6, 3.67 <sup>2</sup> )                                                 |                         |
| Kayaking                  | Ingestion               | Norm (3.8, 3.98 <sup>2</sup> )                                                 |                         |
| Rowing                    | Ingestion               | Norm (3.9, 4.03 <sup>2</sup> )                                                 |                         |
| Swimming                  | Ingestion               | Norm (10, 12.65 <sup>2</sup> )                                                 |                         |
| Swimming                  | Ingestion               | 10-50                                                                          | Dufour et al. (2017)    |
| Swimming                  | Ingestion               | Children: Gamma (0.64, 58)<br>Men: Gamma (0.45, 60)<br>Women: Gamma (0.51, 35) | Schets et al. (2011)    |
| Swimming                  | Ingestion               | 50                                                                             | Steyn et al. (2004)     |
| Swimming                  | Ingestion               | Children: 37<br>Men: 22<br>Women: 12                                           | WHO (2006)              |

Table S4 The infection cases, population, and infection rate constant in different gender and age groups in Germany

| Gender | Age   | Infection case<br>(RKI, 2021) | German population in<br>2020<br>(DESTATIS, 2020; UN,<br>2019) | Infection rate in the<br>group<br>(%) | Infection rate constant = Infection rate in the<br>group/Average infection rate |
|--------|-------|-------------------------------|---------------------------------------------------------------|---------------------------------------|---------------------------------------------------------------------------------|
| Male   | 0-4   | 17,165                        | 2,037,921                                                     | 0.84                                  | 0.40                                                                            |
| Female | 0-4   | 16,128                        | 1,933,933                                                     | 0.83                                  | 0.40                                                                            |
| Male   | 5-14  | 57,063                        | 3,884,565                                                     | 1.47                                  | 0.71                                                                            |
| Female | 5-14  | 52,261                        | 3,623,511                                                     | 1.44                                  | 0.69                                                                            |
| Male   | 15-34 | 279,388                       | 9,852,047                                                     | 2.84                                  | 1.36                                                                            |
| Female | 15-34 | 283,274                       | 9,089,283                                                     | 3.12                                  | 1.50                                                                            |
| Male   | 35-59 | 342,142                       | 14,687,138                                                    | 2.33                                  | 1.12                                                                            |
| Female | 35-59 | 384,156                       | 14,500,188                                                    | 2.65                                  | 1.27                                                                            |
| Male   | 60-79 | 142,496                       | 8,448,369                                                     | 1.69                                  | 0.81                                                                            |
| Female | 60-79 | 145,309                       | 9,418,632                                                     | 1.54                                  | 0.74                                                                            |
| Male   | 80-   | 60,527                        | 2,177,822                                                     | 2.78                                  | 1.34                                                                            |
| Female | 80-   | 122,101                       | 3,537,147                                                     | 3.45                                  | 1.66                                                                            |

Table S5 The domestic wastewater proportion in four German states and WWTPs with different capacity sizes (DESTATIS, 2016).

|               | 1000-2000 | 2001-5000 | 5001-10000 | 10001-50000 | 50001-100000 | >100000 |
|---------------|-----------|-----------|------------|-------------|--------------|---------|
| Saxony        | 0.79      | 0.77      | 0.72       | 0.64        | 0.64         | 0.86    |
| Saxony-Anhalt | 0.89      | 0.86      | 0.8        | 0.71        | 0.78         | 0.54    |
| Thuringia     | 0.81      | 0.78      | 0.8        | 0.68        | 0.7          | 0.61    |
| Brandenburg   | 0.86      | 0.86      | 0.75       | 0.74        | 0.6          | 0.84    |



Table S6 The SARS-CoV-2 concentration in patients' stool and urine

| Virus      | Media  | Variable | Min Concentration  | Max Concentration  | Unit      | Reference                                                   |
|------------|--------|----------|--------------------|--------------------|-----------|-------------------------------------------------------------|
| SARS-CoV-2 | stool* | $n_s$    | $5.50 \times 10^2$ | $1.20 \times 10^5$ | copies/mL | Pan et al. (2020)                                           |
| SARS-CoV-2 | stool* | $n_s$    | $6.00 \times 10^5$ | $7.00 \times 10^6$ | copies/mL | Zang et al. (2020)                                          |
| SARS-CoV-2 | stool* | $n_s$    | $2.70 \times 10^7$ | $3.10 \times 10^8$ | copies/mL | Kim et al. (2020)                                           |
| SARS-CoV-2 | stool* | $n_s$    | $5.0 \times 10^3$  | $3.98 \times 10^7$ | copies/mL | Proplanta (2021)                                            |
| SARS-CoV-2 | stool* | $n_s$    | $1.00 \times 10^2$ | $1.00 \times 10^7$ | copies/mL | Jones et al. (2020)                                         |
| SARS-CoV-2 | stool* | $n_s$    |                    | $8.00 \times 10^6$ | copies/mL | Jones et al. (2020)                                         |
| SARS-CoV-2 | stool* | $n_s$    | $1.55 \times 10^3$ | $6.46 \times 10^8$ | copies/g  | Wölfel et al. (2020)                                        |
| SARS-CoV-2 | urine  | $n_u$    | $3.20 \times 10^2$ | $6.10 \times 10^5$ | copies/mL | Jones et al. (2020); Peng et al. (2020); Yoon et al. (2020) |
| SARS-CoV-2 | urine  | $n_u$    | 3.89               | $1.23 \times 10^2$ | copies/mL | Jeong et al. (2020)                                         |
| SARS-CoV-2 | urine  | $n_u$    | $4.90 \times 10^7$ | $1.09 \times 10^8$ | copies/mL | Kim et al. (2020)                                           |
| SARS-CoV-2 | urine  | $n_u$    |                    | $2.50 \times 10$   | copies/mL | Yang et al. (2020)                                          |

\*The density of stool is 1.06 g/mL (Brown et al., 1996; Penn et al., 2018)

Table S7 The average values and 95% confidence intervals of the total Sobol's sensitivity index of 7 model parameters

| Categor<br>y* | Total Sobol's sensitivity index, $S_{Ti}^{\dagger}$ |          |          |          |          |          |          |          |          |          |          |          |          |          |          |          |          |          |          |          |          |
|---------------|-----------------------------------------------------|----------|----------|----------|----------|----------|----------|----------|----------|----------|----------|----------|----------|----------|----------|----------|----------|----------|----------|----------|----------|
|               | k                                                   |          |          | m        |          |          | $\gamma$ |          |          | $V_u$    |          |          | $n_u$    |          |          | $m_s$    |          |          | $n_s$    |          |          |
|               | Ave                                                 | 95% CI   |          | Ave      | 95% CI   |          | Ave      | 95% CI   |          | Ave      | 95% CI   |          | Ave      | 95% CI   |          | Ave      | 95% CI   |          | Ave      | 95% CI   |          |
| N,Swm,M,5-14  | 1.01E+00                                            | 4.87E-01 | 1.79E+00 | 5.73E-01 | 2.86E-01 | 9.61E-02 | 3.29E-02 | 1.24E-02 | 6.76E-02 | 2.87E-01 | 9.75E-02 | 5.91E-01 | 4.81E-01 | 1.89E-01 | 8.92E-01 | 6.13E-03 | 2.32E-03 | 1.39E-02 | 4.32E-01 | 1.84E-01 | 7.54E-01 |
| N,Swm,F,5-14  | 1.00E+00                                            | 4.97E-01 | 1.83E+00 | 5.84E-01 | 2.64E-01 | 1.00E+00 | 3.06E-02 | 1.26E-02 | 6.15E-02 | 2.80E-01 | 1.02E-01 | 6.60E-01 | 4.90E-01 | 1.86E-01 | 9.11E-01 | 5.91E-03 | 2.14E-03 | 1.25E-02 | 4.36E-01 | 1.80E-01 | 7.35E-01 |
| N,Swm,M,15-34 | 9.76E-01                                            | 4.37E-01 | 1.72E+00 | 7.08E-01 | 2.91E-01 | 1.21E+00 | 3.08E-02 | 1.01E-02 | 6.43E-02 | 2.75E-01 | 7.66E-02 | 6.29E-01 | 5.17E-01 | 1.50E-01 | 9.80E-01 | 6.06E-03 | 1.74E-03 | 1.47E-02 | 4.31E-01 | 1.47E-01 | 8.12E-01 |
| N,Swm,F,15-34 | 9.88E-01                                            | 4.41E-01 | 1.82E+00 | 7.19E-01 | 3.20E-01 | 1.29E+00 | 3.13E-02 | 1.17E-02 | 6.67E-02 | 2.90E-01 | 8.49E-02 | 6.78E-01 | 5.06E-01 | 1.61E-01 | 9.34E-01 | 6.24E-03 | 1.89E-03 | 1.36E-02 | 4.88E-01 | 1.66E-01 | 8.74E-01 |
| N,Swm,M,35-59 | 9.87E-01                                            | 4.36E-01 | 1.65E+00 | 7.29E-01 | 3.08E-01 | 1.26E+00 | 3.11E-02 | 1.17E-02 | 6.37E-02 | 3.18E-01 | 8.39E-02 | 5.95E-01 | 5.06E-01 | 1.68E-01 | 1.09E+00 | 6.01E-03 | 1.86E-03 | 1.27E-02 | 4.27E-01 | 1.57E-01 | 7.62E-01 |
| N,Swm,F,35-59 | 9.77E-01                                            | 4.23E-01 | 1.77E+00 | 7.20E-01 | 2.97E-01 | 1.27E+00 | 3.25E-02 | 1.12E-02 | 6.59E-02 | 2.73E-01 | 8.38E-02 | 6.46E-01 | 5.15E-01 | 1.64E-01 | 9.95E-01 | 6.22E-03 | 1.86E-03 | 1.47E-02 | 4.48E-01 | 1.62E-01 | 8.24E-01 |
| N,Swm,M,60-79 | 9.51E-01                                            | 4.50E-01 | 1.72E+00 | 7.42E-01 | 3.16E-01 | 1.33E+00 | 3.22E-02 | 1.14E-02 | 6.67E-02 | 2.78E-01 | 8.60E-02 | 5.94E-01 | 5.17E-01 | 1.55E-01 | 9.71E-01 | 6.50E-03 | 1.99E-03 | 1.50E-02 | 4.34E-01 | 1.66E-01 | 8.12E-01 |
| N,Swm,F,60-79 | 9.50E-01                                            | 4.16E-01 | 1.65E+00 | 7.15E-01 | 2.94E-01 | 1.38E+00 | 3.16E-02 | 1.07E-02 | 6.62E-02 | 2.89E-01 | 8.85E-02 | 5.69E-01 | 5.04E-01 | 1.66E-01 | 1.10E+00 | 6.19E-03 | 1.89E-03 | 1.40E-02 | 4.53E-01 | 1.53E-01 | 8.39E-01 |
| I,Swm,M,5-14  | 9.38E-01                                            | 5.03E-01 | 1.55E+00 | 5.63E-01 | 2.94E-01 | 8.99E-01 | 3.10E-02 | 1.33E-02 | 5.96E-02 | 1.46E-01 | 4.98E-02 | 3.73E-01 | 2.55E-01 | 9.66E-01 | 5.29E-01 | 9.17E-03 | 3.70E-03 | 1.78E-02 | 6.38E-01 | 3.12E-01 | 1.05E+00 |
| I,Swm,F,5-14  | 9.52E-01                                            | 5.04E-01 | 1.51E+00 | 5.70E-01 | 2.87E-01 | 9.34E-01 | 3.13E-02 | 1.33E-02 | 6.05E-02 | 1.48E-01 | 5.01E-02 | 3.31E-01 | 2.65E-01 | 9.49E-01 | 5.90E-01 | 9.06E-03 | 3.66E-03 | 1.81E-02 | 6.41E-01 | 3.10E-01 | 1.06E+00 |
| I,Swm,M,15-34 | 9.43E-01                                            | 4.79E-01 | 1.65E+00 | 6.94E-01 | 3.53E-01 | 1.20E+00 | 3.32E-02 | 1.31E-02 | 6.65E-02 | 1.38E-01 | 4.41E-02 | 3.27E-01 | 2.57E-01 | 8.69E-01 | 5.75E-01 | 8.77E-03 | 3.40E-03 | 1.77E-02 | 6.46E-01 | 2.86E-01 | 1.09E+00 |
| I,Swm,F,15-34 | 9.27E-01                                            | 4.52E-01 | 1.51E+00 | 7.13E-01 | 3.31E-01 | 1.27E+00 | 3.31E-02 | 1.23E-02 | 6.58E-02 | 1.48E-01 | 4.13E-02 | 3.59E-01 | 2.72E-01 | 8.43E-01 | 6.26E-01 | 9.04E-03 | 3.30E-03 | 1.89E-02 | 6.65E-01 | 2.83E-01 | 1.15E+00 |
| I,Swm,M,35-59 | 9.57E-01                                            | 4.81E-01 | 1.55E+00 | 7.44E-01 | 3.60E-01 | 1.28E+00 | 3.15E-02 | 1.28E-02 | 6.19E-02 | 1.58E-01 | 4.25E-02 | 3.93E-01 | 2.73E-01 | 8.16E-01 | 6.21E-01 | 9.55E-03 | 3.56E-03 | 1.95E-02 | 6.75E-01 | 3.10E-01 | 1.15E+00 |
| I,Swm,F,35-59 | 9.92E-01                                            | 4.21E-01 | 1.79E+00 | 6.98E-01 | 3.05E-01 | 1.17E+00 | 3.25E-02 | 1.12E-02 | 6.74E-02 | 1.81E-01 | 4.18E-02 | 4.17E-01 | 2.54E-01 | 7.93E-01 | 5.55E-01 | 8.82E-03 | 2.91E-03 | 1.78E-02 | 6.49E-01 | 2.53E-01 | 1.07E+00 |
| I,Swm,M,60-79 | 9.44E-01                                            | 4.52E-01 | 1.68E+00 | 7.38E-01 | 3.18E-01 | 1.38E+00 | 3.06E-02 | 1.24E-02 | 5.78E-02 | 1.47E-01 | 4.10E-02 | 3.61E-01 | 2.85E-01 | 8.16E-01 | 6.30E-01 | 9.33E-03 | 3.29E-03 | 2.09E-02 | 6.43E-01 | 2.87E-01 | 1.10E+00 |
| I,Swm,F,60-79 | 9.83E-01                                            | 4.97E-01 | 1.65E+00 | 7.08E-01 | 3.57E-01 | 1.27E+00 | 3.15E-02 | 1.33E-02 | 6.47E-02 | 1.52E-01 | 4.25E-02 | 3.75E-01 | 2.89E-01 | 9.04E-01 | 6.29E-01 | 9.73E-03 | 3.40E-03 | 2.16E-02 | 6.73E-01 | 2.97E-01 | 1.12E+00 |

\*N: Normal toilet usage frequency; I: Possible increasing toilet usage frequency during lockdown; Swm: Swimming activities; M: Male; F: Female; number: age groups. <sup>†</sup>Ave: Average; CI: Confidence interval

Table S8 The average values and 95% confidence intervals of Spearman's rank correlations of 7 model parameters

| Categor<br>y* | Spearman's rank correlation, $\rho^\dagger$ |          |          |          |          |          |           |           |           |          |          |          |          |          |          |          |          |          |          |          |          |
|---------------|---------------------------------------------|----------|----------|----------|----------|----------|-----------|-----------|-----------|----------|----------|----------|----------|----------|----------|----------|----------|----------|----------|----------|----------|
|               | k                                           |          | m        |          | $\gamma$ |          | $v_u$     |           | $n_u$     |          | $m_s$    |          | $n_s$    |          |          |          |          |          |          |          |          |
|               | Ave                                         | 95% CI   | Ave      | 95% CI   | Ave      | 95% CI   | Ave       | 95% CI    | Ave       | 95% CI   | Ave      | 95% CI   | Ave      | 95% CI   |          |          |          |          |          |          |          |
| N,Swm,M,5-14  | 4.34E-01                                    | 4.30E-01 | 4.38E-01 | 4.06E-01 | 4.02E-01 | 4.10E-01 | -5.54E-02 | -6.07E-02 | -5.04E-02 | 9.94E-02 | 9.43E-02 | 1.05E-01 | 3.64E-01 | 3.60E-01 | 3.68E-01 | 2.16E-02 | 1.64E-02 | 2.66E-02 | 5.62E-01 | 5.59E-01 | 5.66E-01 |
| N,Swm,F,5-14  | 4.34E-01                                    | 4.30E-01 | 4.38E-01 | 4.06E-01 | 4.02E-01 | 4.10E-01 | -5.53E-02 | -6.02E-02 | -5.02E-02 | 9.95E-02 | 9.46E-02 | 1.04E-01 | 3.65E-01 | 3.60E-01 | 3.69E-01 | 2.16E-02 | 1.66E-02 | 2.70E-02 | 5.62E-01 | 5.59E-01 | 5.66E-01 |
| N,Swm,M,15-34 | 3.93E-01                                    | 3.89E-01 | 3.97E-01 | 5.42E-01 | 5.39E-01 | 5.45E-01 | -5.01E-02 | -5.53E-02 | -4.52E-02 | 9.02E-02 | 8.48E-02 | 9.55E-02 | 3.29E-01 | 3.25E-01 | 3.34E-01 | 1.96E-02 | 1.43E-02 | 2.49E-02 | 5.07E-01 | 5.04E-01 | 5.11E-01 |
| N,Swm,F,15-34 | 4.01E-01                                    | 3.97E-01 | 4.05E-01 | 5.20E-01 | 5.16E-01 | 5.23E-01 | -5.13E-02 | -5.68E-02 | -4.61E-02 | 9.19E-02 | 8.66E-02 | 9.72E-02 | 3.36E-01 | 3.32E-01 | 3.41E-01 | 2.02E-02 | 1.49E-02 | 2.56E-02 | 5.17E-01 | 5.13E-01 | 5.21E-01 |
| N,Swm,M,35-59 | 3.93E-01                                    | 3.89E-01 | 3.97E-01 | 5.42E-01 | 5.39E-01 | 5.45E-01 | -5.01E-02 | -5.54E-02 | -4.48E-02 | 9.02E-02 | 8.53E-02 | 9.51E-02 | 3.29E-01 | 3.25E-01 | 3.34E-01 | 1.96E-02 | 1.45E-02 | 2.46E-02 | 5.07E-01 | 5.03E-01 | 5.11E-01 |
| N,Swm,F,35-59 | 4.01E-01                                    | 3.97E-01 | 4.05E-01 | 5.20E-01 | 5.16E-01 | 5.23E-01 | -5.09E-02 | -5.62E-02 | -4.55E-02 | 9.19E-02 | 8.66E-02 | 9.70E-02 | 3.36E-01 | 3.32E-01 | 3.41E-01 | 2.01E-02 | 1.46E-02 | 2.53E-02 | 5.17E-01 | 5.14E-01 | 5.21E-01 |
| N,Swm,M,60-79 | 3.93E-01                                    | 3.89E-01 | 3.97E-01 | 5.42E-01 | 5.38E-01 | 5.45E-01 | -5.01E-02 | -5.51E-02 | -4.51E-02 | 9.01E-02 | 8.46E-02 | 9.54E-02 | 3.30E-01 | 3.25E-01 | 3.34E-01 | 1.96E-02 | 1.39E-02 | 2.49E-02 | 5.07E-01 | 5.04E-01 | 5.11E-01 |
| N,Swm,F,60-79 | 4.01E-01                                    | 3.97E-01 | 4.05E-01 | 5.20E-01 | 5.16E-01 | 5.23E-01 | -5.11E-02 | -5.64E-02 | -4.61E-02 | 9.19E-02 | 8.65E-02 | 9.73E-02 | 3.36E-01 | 3.31E-01 | 3.41E-01 | 2.00E-02 | 1.43E-02 | 2.53E-02 | 5.17E-01 | 5.13E-01 | 5.21E-01 |
| I,Swm,M,5-14  | 4.33E-01                                    | 4.29E-01 | 4.37E-01 | 4.06E-01 | 4.02E-01 | 4.10E-01 | -5.54E-02 | -6.03E-02 | -4.99E-02 | 8.96E-02 | 8.46E-02 | 9.48E-02 | 3.21E-01 | 3.16E-01 | 3.26E-01 | 2.31E-02 | 1.76E-02 | 2.83E-02 | 5.98E-01 | 5.95E-01 | 6.02E-01 |
| I,Swm,F,5-14  | 4.33E-01                                    | 4.29E-01 | 4.37E-01 | 4.06E-01 | 4.02E-01 | 4.10E-01 | -5.52E-02 | -6.02E-02 | -5.00E-02 | 8.94E-02 | 8.44E-02 | 9.47E-02 | 3.21E-01 | 3.16E-01 | 3.25E-01 | 2.31E-02 | 1.81E-02 | 2.81E-02 | 5.98E-01 | 5.95E-01 | 6.02E-01 |
| I,Swm,M,15-34 | 3.93E-01                                    | 3.89E-01 | 3.97E-01 | 5.42E-01 | 5.38E-01 | 5.45E-01 | -5.00E-02 | -5.53E-02 | -4.49E-02 | 8.09E-02 | 7.54E-02 | 8.61E-02 | 2.90E-01 | 2.85E-01 | 2.94E-01 | 2.10E-02 | 1.61E-02 | 2.58E-02 | 5.40E-01 | 5.36E-01 | 5.44E-01 |
| I,Swm,F,15-34 | 4.01E-01                                    | 3.96E-01 | 4.05E-01 | 5.19E-01 | 5.16E-01 | 5.23E-01 | -5.12E-02 | -5.65E-02 | -4.58E-02 | 8.27E-02 | 7.78E-02 | 8.79E-02 | 2.96E-01 | 2.91E-01 | 3.00E-01 | 2.10E-02 | 1.61E-02 | 2.62E-02 | 5.51E-01 | 5.47E-01 | 5.55E-01 |
| I,Swm,M,35-59 | 3.93E-01                                    | 3.89E-01 | 3.97E-01 | 5.42E-01 | 5.38E-01 | 5.45E-01 | -5.00E-02 | -5.47E-02 | -4.53E-02 | 8.09E-02 | 7.55E-02 | 8.57E-02 | 2.90E-01 | 2.86E-01 | 2.94E-01 | 2.08E-02 | 1.55E-02 | 2.60E-02 | 5.40E-01 | 5.36E-01 | 5.43E-01 |
| I,Swm,F,35-59 | 4.00E-01                                    | 3.96E-01 | 4.04E-01 | 5.19E-01 | 5.16E-01 | 5.23E-01 | -5.11E-02 | -5.60E-02 | -4.57E-02 | 8.25E-02 | 7.74E-02 | 8.76E-02 | 2.96E-01 | 2.91E-01 | 3.00E-01 | 2.13E-02 | 1.62E-02 | 2.65E-02 | 5.51E-01 | 5.47E-01 | 5.55E-01 |
| I,Swm,M,60-79 | 3.93E-01                                    | 3.89E-01 | 3.97E-01 | 5.42E-01 | 5.38E-01 | 5.45E-01 | -4.99E-02 | -5.47E-02 | -4.48E-02 | 8.09E-02 | 7.58E-02 | 8.61E-02 | 2.90E-01 | 2.85E-01 | 2.94E-01 | 2.08E-02 | 1.56E-02 | 2.60E-02 | 5.40E-01 | 5.37E-01 | 5.44E-01 |
| I,Swm,F,60-79 | 4.00E-01                                    | 3.96E-01 | 4.05E-01 | 5.19E-01 | 5.16E-01 | 5.23E-01 | -5.12E-02 | -5.67E-02 | -4.59E-02 | 8.27E-02 | 7.77E-02 | 8.77E-02 | 2.96E-01 | 2.91E-01 | 3.00E-01 | 2.14E-02 | 1.61E-02 | 2.66E-02 | 5.51E-01 | 5.47E-01 | 5.54E-01 |

\*N: Normal toilet usage frequency; I: Possible increasing toilet usage frequency during lockdown; Swm: Swimming activities; M: Male; F: Female; number: age groups. <sup>†</sup>Ave: Average; CI: Confidence interval

Table S9 The percentage of resident population connected to urban wastewater collecting system in 2016-2018 estimated by OECD (OECD, 2021)

| Country         | 2016 | 2017 | 2018 |
|-----------------|------|------|------|
| Australia       | 92   | 93   | 93   |
| Austria         | 95   |      | 100  |
| Belgium         | 88   | 88   |      |
| Canada          | 86   | 86   |      |
| Chile           | 100  | 100  |      |
| Colombia        | 88   | 88   |      |
| Czech Republic  | 81   | 82   | 82   |
| Denmark         | 92   | 92   | 92   |
| Estonia         | 88   | 88   |      |
| Finland         |      |      | 85   |
| France          | 82   | 82   | 81   |
| Germany         | 97   |      |      |
| Greece          | 93   |      |      |
| Hungary         | 78   | 79   | 80   |
| Iceland         |      |      |      |
| Ireland         | 94   | 94   |      |
| Israel          | 99   | 99   | 99   |
| Japan           | 78   | 79   |      |
| Korea           | 93   | 94   | 94   |
| Latvia          | 100  | 100  | 100  |
| Lithuania       | 77   | 78   | 79   |
| Luxembourg      | 99   |      |      |
| Mexico          |      |      |      |
| Netherlands     | 100  | 100  | 100  |
| Norway          | 100  | 99   | 100  |
| Poland          | 95   | 95   | 96   |
| Portugal        |      | 92   |      |
| Slovak Republic | 89   | 89   | 89   |
| Slovenia        | 92   | 96   | 97   |
| Spain           |      |      |      |
| Sweden          | 87   | 87   |      |
| Switzerland     |      |      |      |
| Turkey          | 71   | 74   | 74   |

Table S10 P values of Mann-Whitney U test of the sensitivity results of the parameters between the categorical factors (toilet usage frequency, gender, and age)

| Category     | Total Sobol's sensitivity index, $S_{Ti}$ |          |          |          |          |          |          | Spearman's rank correlation, $\rho$ |          |          |          |          |          |          |
|--------------|-------------------------------------------|----------|----------|----------|----------|----------|----------|-------------------------------------|----------|----------|----------|----------|----------|----------|
|              | k                                         | m        | $\gamma$ | $v_u$    | $n_u$    | $m_s$    | $n_s$    | k                                   | m        | $\gamma$ | $v_u$    | $n_u$    | $m_s$    | $n_s$    |
| Toilet usage | 3.43E-03                                  | 9.85E-01 | 8.38E-01 | 3.33E-09 | 3.33E-09 | 3.33E-09 | 3.33E-09 | 5.18E-01                            | 4.36E-01 | 4.69E-01 | 2.48E-03 | 2.31E-03 | 1.47E-02 | 4.83E-02 |
| Gender       | 1.10E-01                                  | 4.91E-01 | 1.84E-01 | 6.96E-01 | 8.67E-01 | 8.09E-01 | 7.80E-01 | 2.47E-01                            | 7.11E-01 | 8.94E-01 | 8.49E-01 | 7.30E-01 | 8.35E-01 | 7.44E-01 |
| Age          | 5.40E-12                                  | 5.40E-12 | 5.40E-12 | 5.40E-12 | 5.40E-12 | 5.40E-12 | 5.40E-12 | 4.27E-12                            | 4.44E-12 | 5.07E-12 | 5.09E-12 | 4.88E-12 | 5.27E-12 | 4.87E-12 |

Fig. S1 The geographic distribution of the district-level of COVID-19 epidemic situation, estimated SARS-CoV-2 pRNA amount discharged from WWTPs, and the pRNA concentrations along the rivers of the study Elbe at lower 95% confidence interval boundary in **a)** Apr 2020, **b)** June 2020, **c)** October 2020 and **d)** January 2021. It included the COVID-19 active infection cases in 100,000 inhabitants (purple color shading), pRNA concentrations in surface water (red color shading), and the sum of pRNA WWTP-influent dose and untreated amount (white round label).

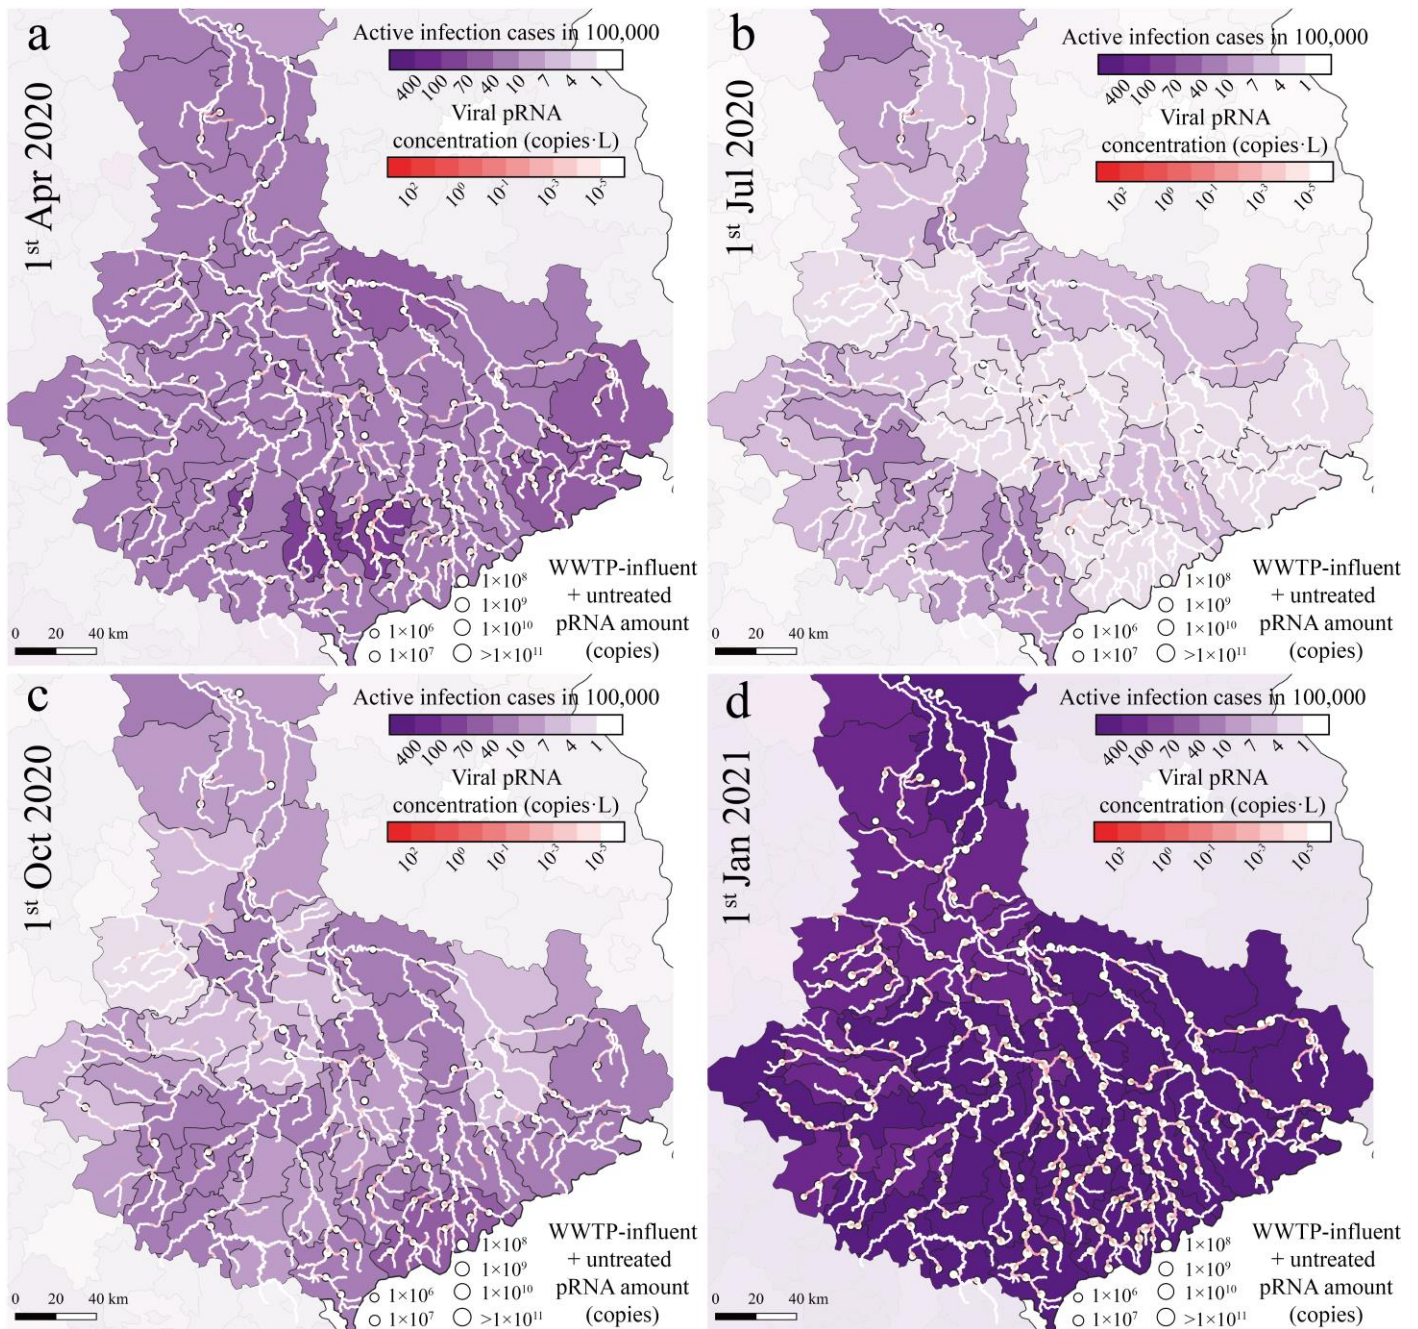

Fig. S2 The geographic distribution of the district-level of COVID-19 epidemic situation, estimated SARS-CoV-2 pRNA amount discharged from WWTPs, and the pRNA concentrations along the rivers of the study Elbe at upper 95% confidence interval boundary in **a)** Apr 2020, **b)** June 2020, **c)** October 2020 and **d)** January 2021. It included the COVID-19 active infection cases in 100,000 inhabitants (purple color shading), pRNA concentrations in surface water (red color shading), and the sum of pRNA WWTP-influent dose and untreated amount (white round label).

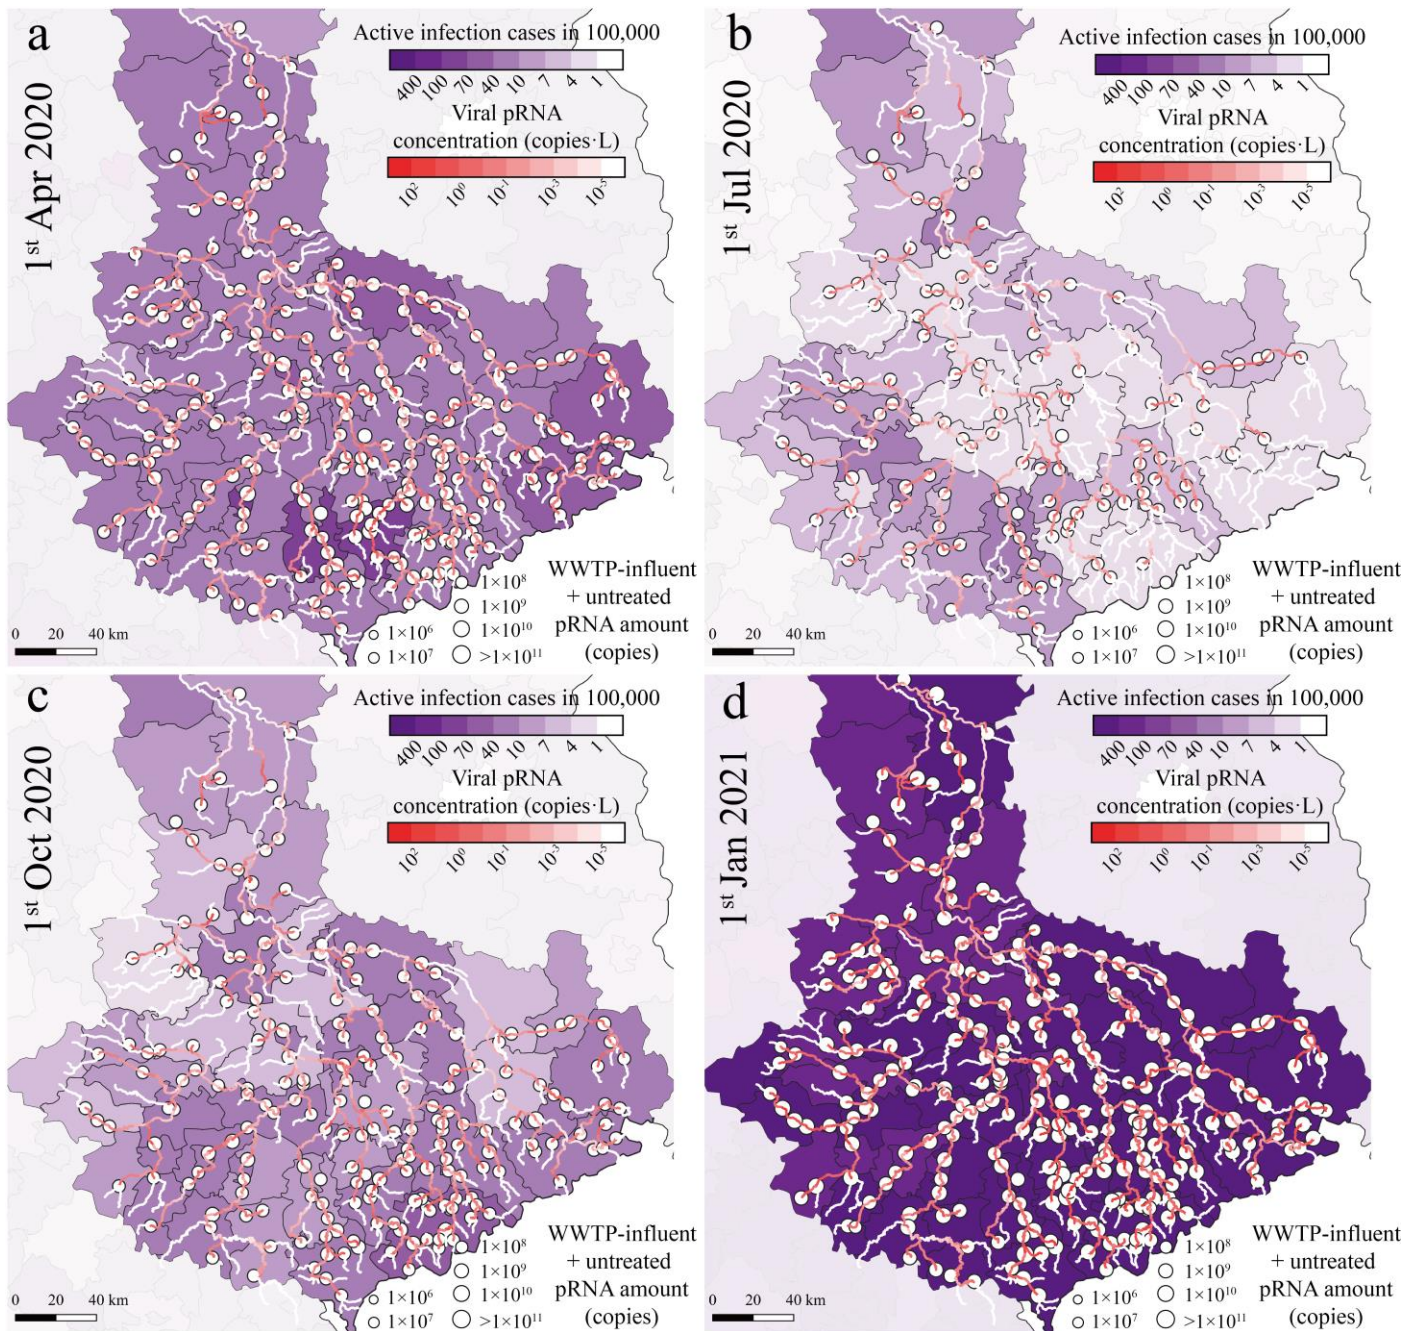

Fig. S3 The geographic distribution of the district-level of COVID-19 epidemic situation, estimated average SARS-CoV-2 pRNA amount discharged from WWTPs, and the average pRNA concentrations along the rivers of the study Elbe in **a)** Apr 2020, **b)** June 2020, **c)** October 2020, and **d)** January 2021. It included the COVID-19 active infection cases in 100,000 inhabitants (purple color shading), pRNA concentrations in surface water (red color shading), and the sum of pRNA WWTP-influent dose and untreated amount (white round label).

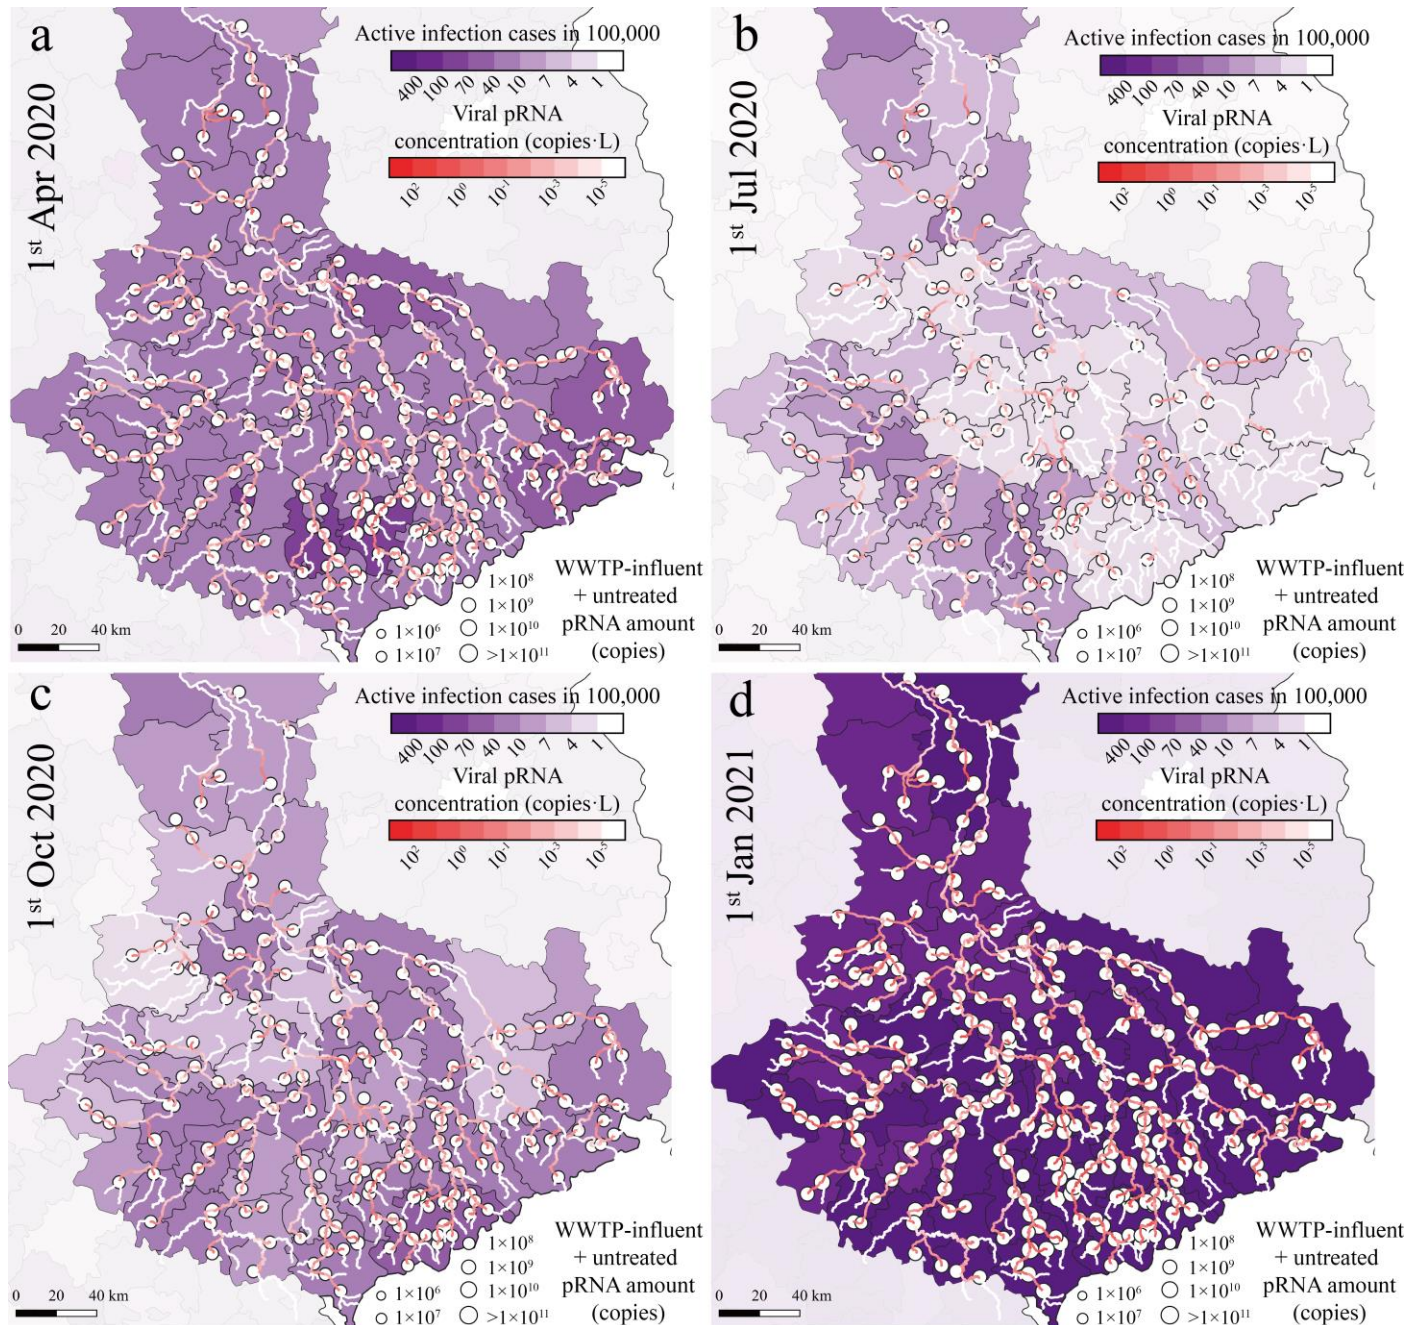



Fig. S4 Log<sub>10</sub>-transformed distributions of median spatial pRNA concentrations in the state of Thuringia, Saxony-Anhalt, Saxony, and Brandenburg in **a)** Apr 2020, **b)** June 2020, **c)** October 2020 and **d)** January 2021

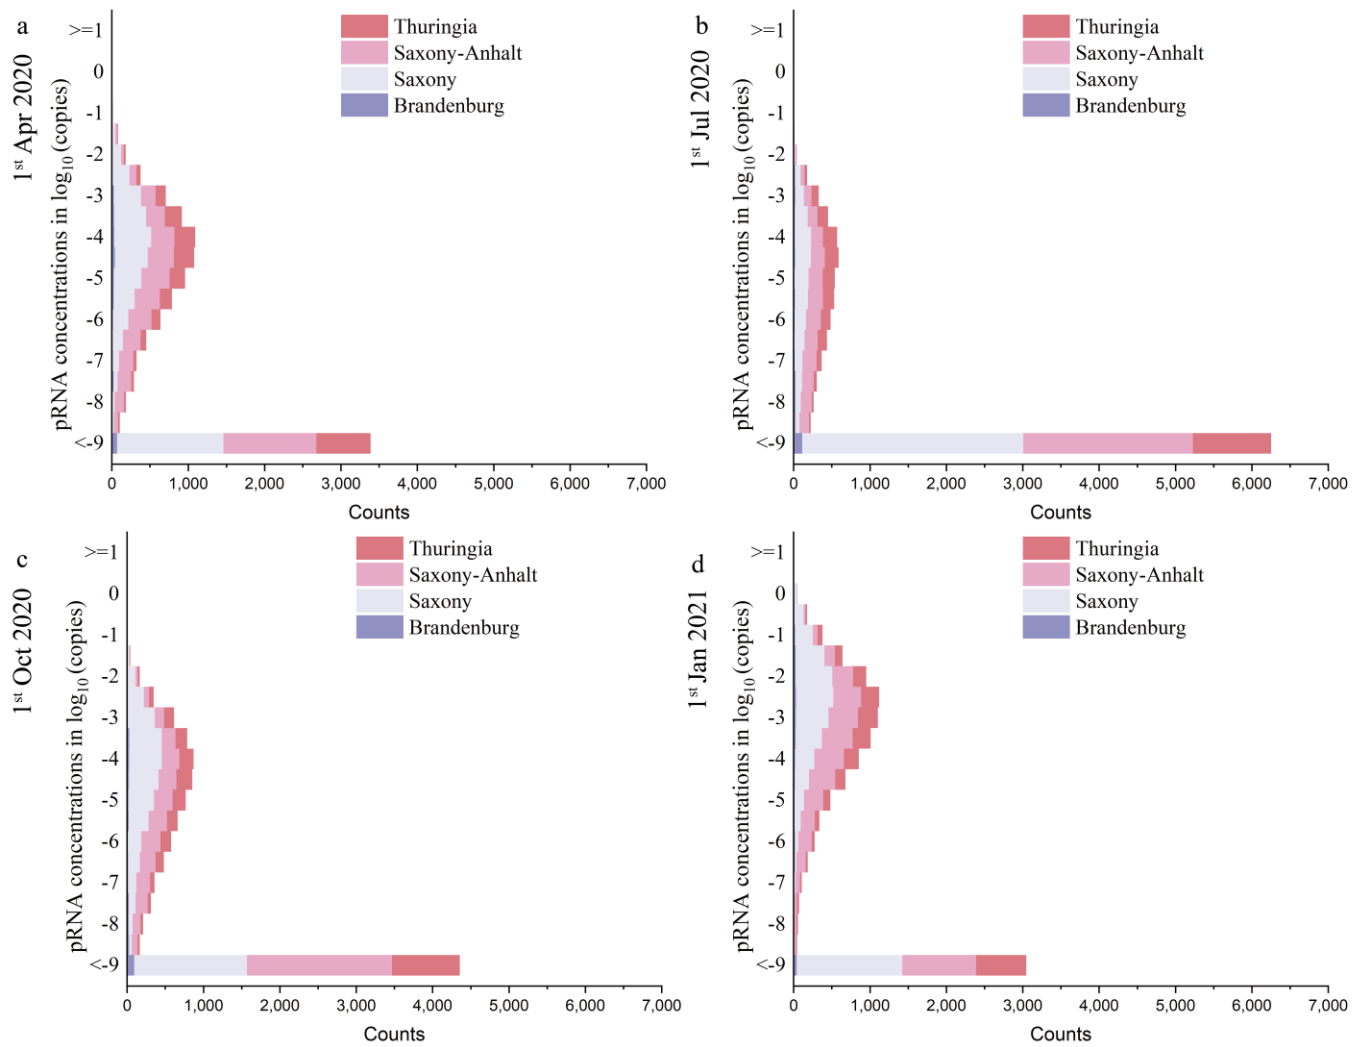

## Reference

- Bradburne AF, Bynoe ML, Tyrrell DA, 1967. Effects of a "new" human respiratory virus in volunteers. *British medical journal.* 3, 767-769. <https://doi.org/10.1136/bmj.3.5568.767>.
- Brown D, Butler D, Orman N, Davies J, 1996. Gross solids transport in small diameter sewers. *Water Science and Technology.* 33, 25-30.
- Clarke JN, James S, 2003. The radicalized self: the impact on the self of the contested nature of the diagnosis of chronic fatigue syndrome. *Social Science & Medicine.* 57, 1387-1395. [https://doi.org/10.1016/S0277-9536\(02\)00515-4](https://doi.org/10.1016/S0277-9536(02)00515-4).
- De Albuquerque N, Baig E, Ma X, Zhang J, He W, Rowe A, et al., 2006. Murine Hepatitis Virus Strain 1 Produces a Clinically Relevant Model of Severe Acute Respiratory Syndrome in A/J Mice. *Journal of Virology.* 80, 10382-10394. <https://doi.org/10.1128/jvi.00747-06>.
- DeDiego ML, Pewe L, Alvarez E, Rejas MT, Perlman S, Enjuanes L, 2008. Pathogenicity of severe acute respiratory coronavirus deletion mutants in hACE-2 transgenic mice. *Virology.* 376, 379-389. <https://doi.org/10.1016/j.virol.2008.03.005>.
- DESTATIS. Statistisches Bundesamt Fachserie 19/Reihe 21.2. Öffentliche Wasserversorgung und öffentliche Abwasserentsorgung, 2016.
- DESTATIS, 2020. Bevölkerung nach Geschlecht und Staatsangehörigkeit. <https://www.destatis.de/DE/Themen/Gesellschaft-Umwelt/Bevoelkerung/Bevoelkerungsstand/Tabellen/zensus-geschlecht-staatsangehoerigkeit-2020.html> (accessed Feb 23 2020)
- Dorevitch S, Panthi S, Huang Y, Li H, Michalek AM, Pratap P, et al., 2011. Water ingestion during water recreation. *Water Research.* 45, 2020-2028. <https://doi.org/10.1016/j.watres.2010.12.006>.
- Dufour AP, Behymer TD, Cantú R, Magnuson M, Wymer LJ, 2017. Ingestion of swimming pool water by recreational swimmers. *Journal of Water and Health.* 15, 429-437. <https://doi.org/10.2166/wh.2017.255>.
- Gideon A, Sauter C, Fieres J, Berger T, Renner B, Wirtz PH, 2019. Kinetics and Interrelations of the Renin Aldosterone Response to Acute Psychosocial Stress: A Neglected Stress System. *The Journal of Clinical Endocrinology & Metabolism.* 105, e762-e773. <https://doi.org/10.1210/clinem/dgz190>.
- Giménez-Nadal José I, Molina José A, Velilla J, 2019. Work time and well-being for workers at home: evidence from the American Time Use Survey. *International Journal of Manpower.* 41, 184-206. 10.1108/IJM-04-2018-0134.
- Heaton KW, Radvan J, Cripps H, Mountford RA, Braddon FE, Hughes AO, 1992. Defecation frequency and timing, and stool form in the general population: a prospective study. *Gut.* 33, 818-824. 10.1136/gut.33.6.818.
- Hirano N, Haga S, Sada Y, Tohyama K, 2001. Susceptibility of Rats of Different Ages to Inoculation with Swine Haemagglutinating Encephalomyelitis Virus (a Coronavirus) by Various Routes. *Journal of Comparative Pathology.* 125, 8-14. <https://doi.org/10.1053/jcpa.2001.0471>.
- Hornung S, Glaser J, 2009. Home-Based Telecommuting and Quality of Life: Further Evidence on an Employee-Oriented Human Resource Practice. *Psychological Reports.* 104, 395-402. 10.2466/pr0.104.2.395-402.

- Jeong HW, Kim S-M, Kim H-S, Kim Y-I, Kim JH, Cho JY, et al., 2020. Viable SARS-CoV-2 in various specimens from COVID-19 patients. *Clinical Microbiology and Infection*. 26, 1520-1524. <https://doi.org/10.1016/j.cmi.2020.07.020>.
- Jones DL, Baluja MQ, Graham DW, Corbishley A, McDonald JE, Malham SK, et al., 2020. Shedding of SARS-CoV-2 in feces and urine and its potential role in person-to-person transmission and the environment-based spread of COVID-19. *Science of The Total Environment*. 749. <https://doi.org/10.1016/j.scitotenv.2020.141364>.
- Jonsson N, Gullberg M, Lindberg AM, 2009. Real-time polymerase chain reaction as a rapid and efficient alternative to estimation of picornavirus titers by tissue culture infectious dose 50% or plaque forming units. *Microbiology and Immunology*. 53, 149-154. <https://doi.org/10.1111/j.1348-0421.2008.00107.x>.
- Kim J-M, Kim HM, Lee EJ, Jo HJ, Yoon Y, Lee N-J, et al., 2020. Detection and isolation of SARS-CoV-2 in serum, urine, and stool specimens of COVID-19 patients from the Republic of Korea. *Osong public health and research perspectives*. 11, 112.
- Lunn TJ, Restif O, Peel AJ, Munster VJ, Wit Ed, Sokolow S, et al., 2019. Dose-response and transmission: the nexus between reservoir hosts, environment and recipient hosts. *Philosophical Transactions of the Royal Society B: Biological Sciences*. 374. <https://doi.org/10.1098/rstb.2019.0016>.
- McBride GB, Stott R, Miller W, Bambic D, Wuertz S, 2013. Discharge-based QMRA for estimation of public health risks from exposure to stormwater-borne pathogens in recreational waters in the United States. *Water Research*. 47, 5282-5297. <https://doi.org/10.1016/j.watres.2013.06.001>.
- Myo K, Thein Win N, Kyaw-Hla S, Thein Thein M, Bolin TD, 1994. A prospective study on defecation frequency, stool weight, and consistency. *Archives of Disease in Childhood*. 71, 311. 10.1136/adc.71.4.311.
- Oakman J, Kinsman N, Stuckey R, Graham M, Weale V, 2020. A rapid review of mental and physical health effects of working at home: how do we optimise health? *BMC Public Health*. 20, 1825. 10.1186/s12889-020-09875-z.
- OECD, 2021. Wastewater treatment recorded by OECD.Stat. [https://stats.oecd.org/Index.aspx?DataSetCode=WATER\\_TREAT](https://stats.oecd.org/Index.aspx?DataSetCode=WATER_TREAT) (accessed March 1 2021)
- Palit S, Lunniss PJ, Scott SM, 2012. The Physiology of Human Defecation. *Digestive Diseases and Sciences*. 57, 1445-1464. <https://doi.org/10.1007/s10620-012-2071-1>.
- Pan Y, Zhang D, Yang P, Poon LLM, Wang Q, 2020. Viral load of SARS-CoV-2 in clinical samples. *The Lancet Infectious Diseases*. 20, 411-412. [https://doi.org/10.1016/S1473-3099\(20\)30113-4](https://doi.org/10.1016/S1473-3099(20)30113-4).
- Panigrahi MK, Kar SK, Singh SP, Ghoshal UC, 2013. Defecation frequency and stool form in a coastal eastern Indian population. *J Neurogastroenterol Motil*. 19, 374-80. 10.5056/jnm.2013.19.3.374.
- Peng L, Liu J, Xu W, Luo Q, Chen D, Lei Z, et al., 2020. SARS-CoV-2 can be detected in urine, blood, anal swabs, and oropharyngeal swabs specimens. *Journal of medical virology*. 92, 1676-1680.
- Penn R, Ward BJ, Strande L, Maurer M, 2018. Review of synthetic human faeces and faecal sludge for sanitation and wastewater research. *Water research*. 132, 222-240.
- Proplanta, 2021. COVID-10: Infektionen & Todesfälle.

- [https://www.proplanta.de/karten/covid-19:infektionen\\_&\\_todesf%C3%A4lle\\_28.02.2021-uebersichtskarte27012020\\_20210228.html](https://www.proplanta.de/karten/covid-19:infektionen_&_todesf%C3%A4lle_28.02.2021-uebersichtskarte27012020_20210228.html) (accessed Jan 11 2021)
- Puig M, Jofre J, Lucena F, Allard A, Wadell G, Girones R, 1994. Detection of adenoviruses and enteroviruses in polluted waters by nested PCR amplification. *Appl Environ Microbiol.* 60, 2963-70. <https://doi.org/10.1128/aem.60.8.2963-2970.1994>.
- Rao SSC, Bharucha AE, Chiarioni G, Felt-Bersma R, Knowles C, Malcolm A, et al., 2016. Anorectal Disorders. *Gastroenterology.* 150, 1430-1442.e4. <https://doi.org/10.1053/j.gastro.2016.02.009>.
- RKI, 2021. COVID-19 (Coronavirus SARS-CoV-2). [https://www.rki.de/DE/Content/InfAZ/N/Neuartiges\\_Coronavirus/nCoV\\_node.html](https://www.rki.de/DE/Content/InfAZ/N/Neuartiges_Coronavirus/nCoV_node.html) (accessed Jan 15 2021)
- Sanjoaquin M, Appleby P, Spencer E, Key T, 2004. Nutrition and lifestyle in relation to bowel movement frequency: a cross-sectional study of 20 630 men and women in EPIC-Oxford. *Public Health Nutrition - PUBLIC HEALTH NUTR.* 7. 10.1079/PHN2003522.
- Schets FM, Schijven JF, de Roda Husman AM, 2011. Exposure assessment for swimmers in bathing waters and swimming pools. *Water Research.* 45, 2392-2400. <https://doi.org/10.1016/j.watres.2011.01.025>.
- Simons CCJM, Schouten LJ, Weijenberg MP, Goldbohm RA, van den Brandt PA, 2010. Bowel Movement and Constipation Frequencies and the Risk of Colorectal Cancer Among Men in the Netherlands Cohort Study on Diet and Cancer. *American Journal of Epidemiology.* 172, 1404-1414. 10.1093/aje/kwq307.
- Steyn M, Jagals P, Genthe B, 2004. Assessment of microbial infection risks posed by ingestion of water during domestic water use and full-contact recreation in a mid-southern African region. *Water Science and Technology.* 50, 301-308. <https://doi.org/10.2166/wst.2004.0071>.
- Tustin DH, 2014. Telecommuting academics within an open distance education environment of South Africa: More content, productive, and healthy? *The International Review of Research in Open and Distributed Learning.* 15. 10.19173/irrodl.v15i3.1770.
- UN. Population Division. *World Population Prospects: The 2019 Revision. Online Edition* UN DESA, New York. United Nations, Department of Economic and Social Affairs, 2019.
- Watanabe T, Bartrand TA, Weir MH, Omura T, Haas CN, 2010. Development of a Dose-Response Model for SARS Coronavirus. *Risk Analysis.* 30, 1129-1138. <https://doi.org/10.1111/j.1539-6924.2010.01427.x>.
- WHO, 2006. Guidelines for safe recreational water environments. Volume 2: Swimming pools and similar environments: World Health Organization.
- Wölfel R, Corman VM, Guggemos W, Seilmaier M, Zange S, Müller MA, et al., 2020. Virological assessment of hospitalized patients with COVID-2019. *Nature.* 581, 465-469.
- Yang B, Li W, Wang J, Tian Z, Cheng X, Zhang Y, et al., 2020. Estimation of the potential spread risk of COVID-19: Occurrence assessment along the Yangtze, Han, and Fu River basins in Hubei, China. *Science of The Total Environment.* 746. <https://doi.org/10.1016/j.scitotenv.2020.141353>.

- Yoon JG, Yoon J, Song JY, Yoon S-Y, Lim CS, Seong H, et al., 2020. Clinical significance of a high SARS-CoV-2 viral load in the saliva. *Journal of Korean medical science*. 35.
- Zang R, Castro MFG, McCune BT, Zeng Q, Rothlauf PW, Sonnek NM, et al., 2020. TMPRSS2 and TMPRSS4 promote SARS-CoV-2 infection of human small intestinal enterocytes. *Science immunology*. 5.
- Zhang X, Wang J, 2020. Deducing the Dose-response Relation for Coronaviruses from COVID-19, SARS and MERS Meta-analysis Results. medRxiv. <https://doi.org/10.1101/2020.06.26.20140624>.
